# Supplementary material for: Hippo Signaling Pathway Dysregulation in Human Huntington’s Disease Brain and Neuronal Stem Cells
Source: PubMed Central journal article supplement (PMC6063913; doi:10.1038/s41598-018-29319-4), 2018-07-27
Supplement: 41598_2018_29319_MOESM1_ESM.pdf [file 41598_2018_29319_MOESM1_ESM.pdf]

## **Hippo Signaling Pathway Dysregulation in Human Huntington's Disease Brain and Neuronal Stem Cells**

Kaly A. Mueller<sup>1\*</sup>, Kelly E. Glajch<sup>1\*</sup>, Megan N. Huizenga<sup>1</sup>, Remi A. Wilson<sup>1</sup>, Eric J. Granucci<sup>1</sup>, Amanda M. Dios<sup>1</sup>, Adelaide R. Tousley<sup>2</sup>, Maria Iuliano<sup>2</sup>, Elizabeth Weisman<sup>2</sup>, Michael J. LaQuaglia<sup>3</sup>, Marian DiFiglia<sup>2</sup>, Kimberly Kegel-Gleason<sup>2</sup>, Khashayar Vakili<sup>3</sup>, Ghazaleh Sadri-Vakili<sup>1</sup>

\*These authors contributed equally

<sup>1</sup>NeuroEpigenetics Laboratory, MassGeneral Institute for Neurodegenerative Disease (MIND), Massachusetts General Hospital, Boston, MA, 02129-4404, USA

<sup>2</sup>Cellular Neurobiology Laboratory, MassGeneral Institute for Neurodegenerative Disease (MIND), Massachusetts General Hospital, Boston, MA, 02129-4404, USA

<sup>3</sup>Department of Surgery, Boston Children's Hospital

### **Corresponding author:**

Ghazaleh Sadri-Vakili, Ph.D., MassGeneral Institute for Neurodegenerative Disease, Massachusetts General Hospital, Bldg 114 16<sup>th</sup> Street, R2200, Charlestown, MA 02129

Telephone: 617-724-1487

Fax: 617-724-1480

Email: [gsadrivakili@mgh.harvard.edu](mailto:gsadrivakili@mgh.harvard.edu)

**Keywords:** Huntington's disease, transcription, YAP, Hippo pathway, MST1

**Running Title:** Decreased YAP In HD

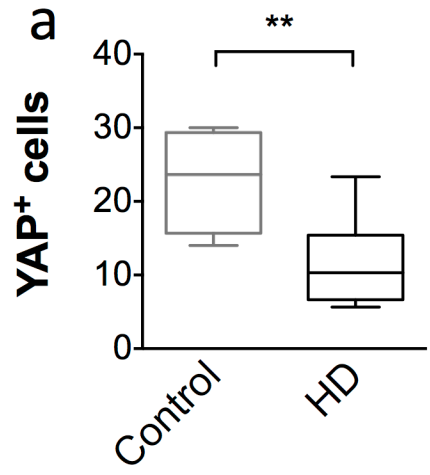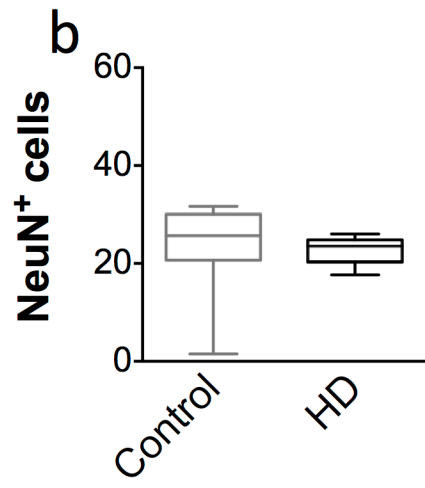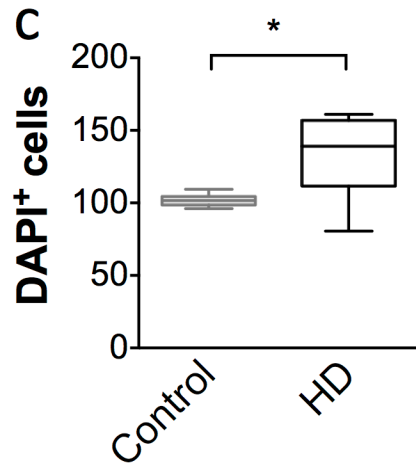

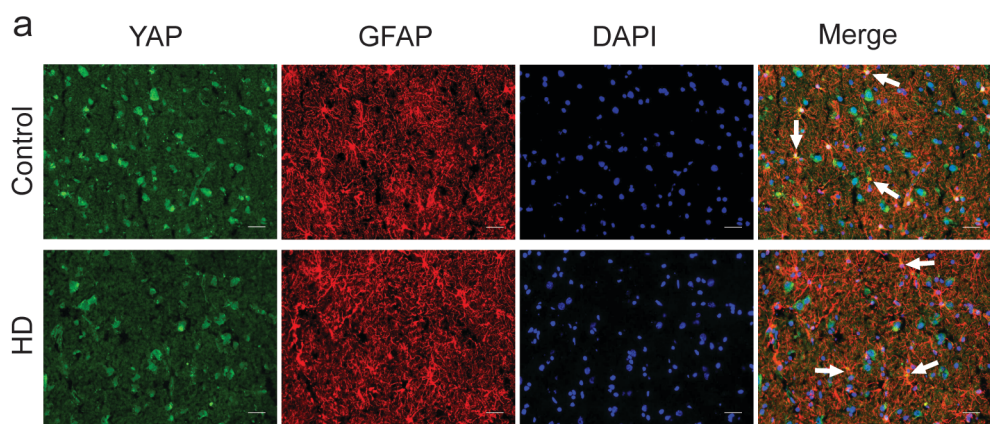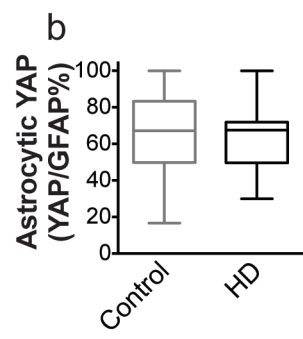

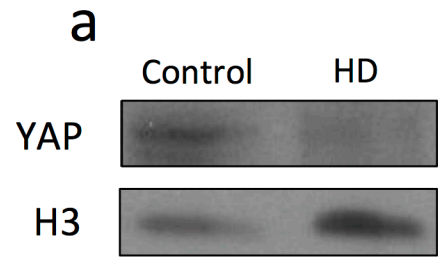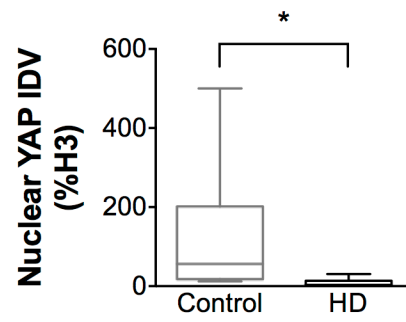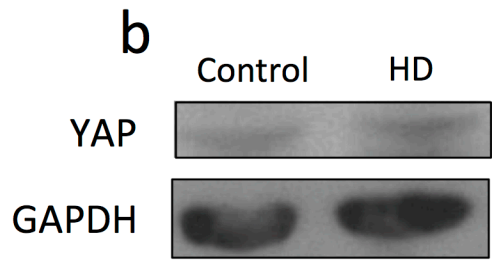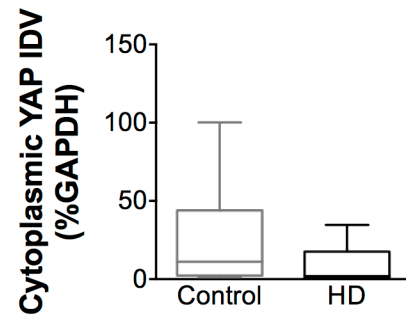

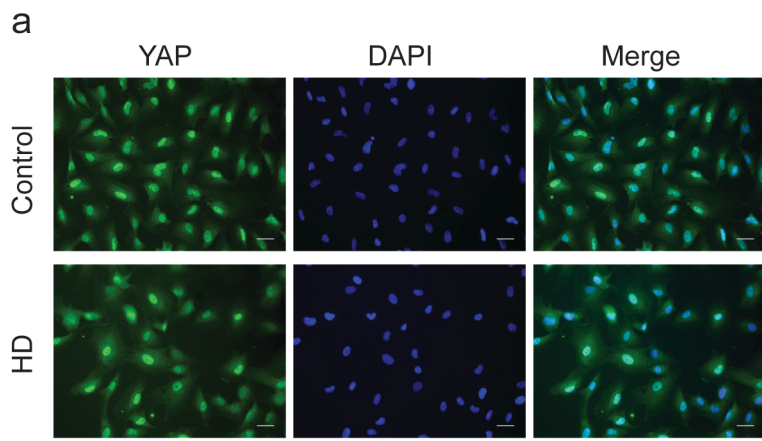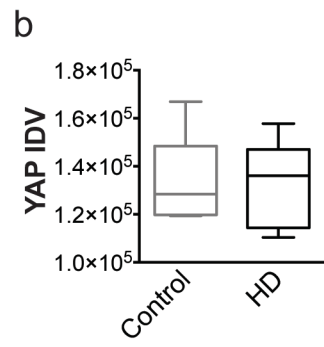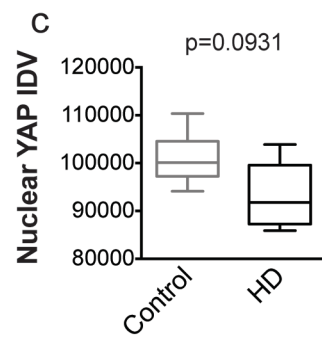

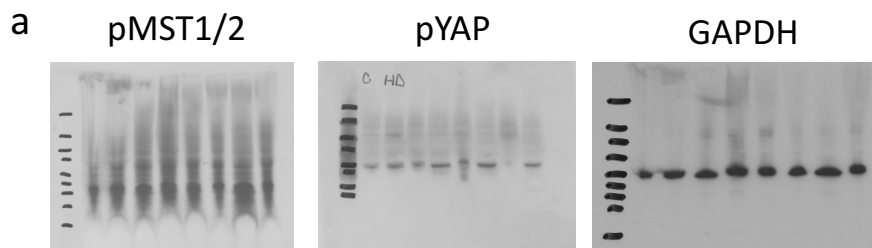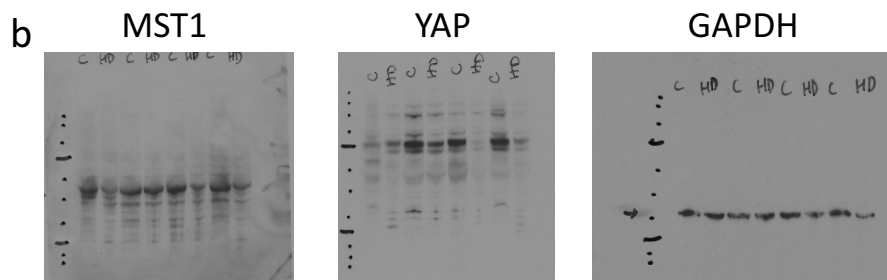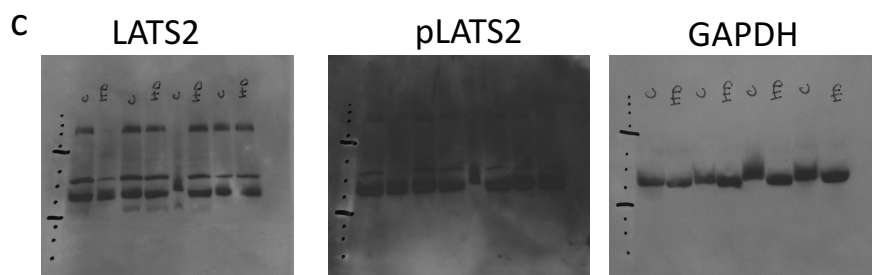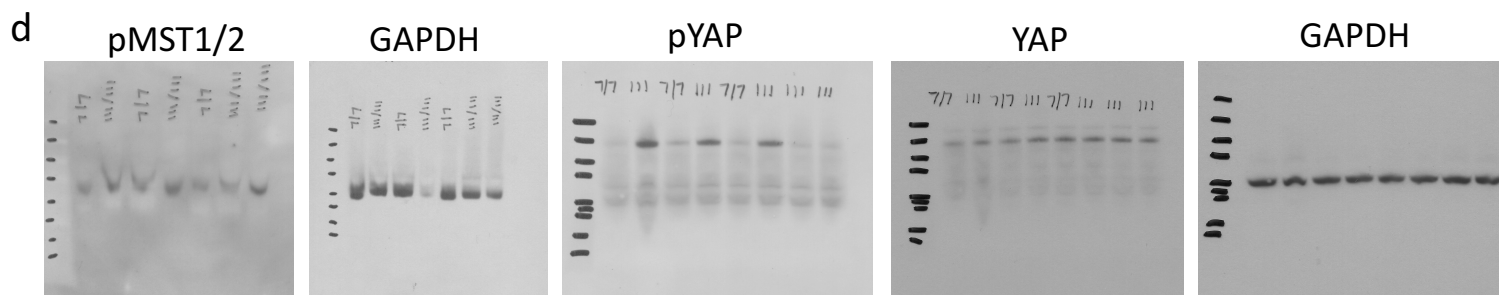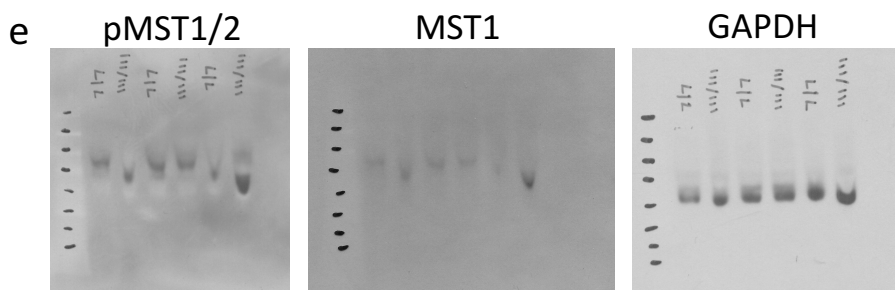

a Htt IP 14-3-3 IB

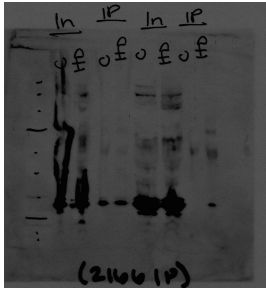

Htt IP YAP IB

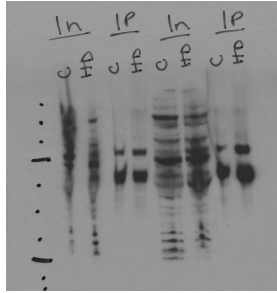

b YAP IP TEAD IB

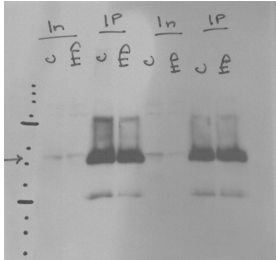

c YAP

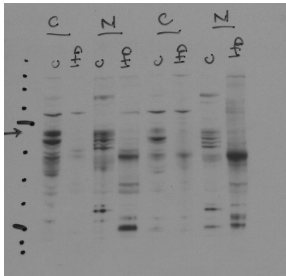

Histone H3

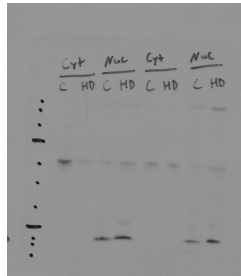

GAPDH

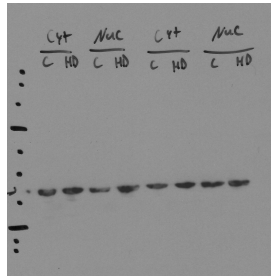

## Supplementary Figure Legends

### Figure S1. YAP, NeuN and DAPI cell counts in post-mortem human cortex

**a)** The total number of YAP+ cells were decreased ( $p=0.0044$ , Mann-Whitney *U* Test) in HD (black;  $n=10$ ) compared to control (grey;  $n=7$ ) human tissue. **b)** The total number of NeuN+ cells were not changed ( $p=0.1689$ , Mann-Whitney *U* Test) in HD compared to control human tissue. **c)** The total number of DAPI+ cells were increased ( $p=0.0172$ , Mann-Whitney *U* Test) in HD compared to control human tissue. Data are presented as median and min-max values. \*  $p<0.05$ , \*\* $p<0.01$ .

### Figure S2. YAP expression in GFAP+ cells in post-mortem human cortex

**a)** Representative images from unaffected control (top;  $n=7$ ) and HD (bottom;  $n=10$ ) human cortical tissue stained with YAP (green), GFAP (red), and DAPI (blue) (left to right). Merged images (far right) show overlap of YAP, GFAP and DAPI. Arrows highlight representative cells; scale bar =  $50\mu\text{M}$ . **b)** The percentage of GFAP+ cells that were YAP+ (YAP/GFAP%) was not different ( $p>0.9999$ , Mann-Whitney *U* Test) in HD (black) compared to control (grey) human tissue. Data are presented as median and min-max values.

### Figure S3. Decreased nuclear YAP in human HD cortex

**a)** Left, representative western blots for YAP (top) and histone H3 (bottom) using human cortex nuclear extracts from unaffected control (left;  $n=6$ ) and HD (right;  $n=6$ ) patients. Right, graph illustrating a decrease ( $p=0.0152$ , Mann-Whitney *U* Test) in nuclear YAP in HD (grey) compared to controls (black). **b)** Left, representative western blots for YAP (top) and GAPDH (bottom) using human cortex cytoplasmic extracts from unaffected control (left;  $n=6$ ) and HD (right;  $n=6$ ) patients. Right, graph illustrating no change ( $p=0.3095$ , Mann-Whitney *U* Test) in cytoplasmic YAP in HD (grey) compared to controls (black). Data are presented as median and min-max values. \*  $p<0.05$ .

### Figure S4. YAP subcellular localization in human iPSC-derived NSCs



**a)** Representative images from unaffected control (WT97) (top; n=6) and HD (HD4) (bottom; n=6) human iPSC-derived NSCs stained with YAP (green; left) and DAPI (blue; middle). Merged images (right) show overlap of YAP and DAPI. Scale bar = 25µM. **b)** Overall YAP intensity was not different ( $p > 0.9999$ , Mann-Whitney *U* Test) between control (grey) and HD (black) NSCs. **c)** There was a trend towards a decrease in nuclear YAP signal ( $p = 0.0931$ , Mann-Whitney *U* Test) in HD compared to control tissue. Data are presented as median and min-max values.

**Figure S5. Uncropped western blots from Figure 3**

Uncropped representative western blots from **a)** Figure 3a probed for pMST1/2, pYAP, and GAPDH (left to right); **b)** Figure 3c probed for MST1, YAP, and GAPDH (left to right); **c)** Figure 3e probed for LATS2, pLATS2, and GAPDH (left to right); **d)** Figure 3g probed for pMST1/2, GAPDH, pYAP, YAP, and GAPDH (left to right); **e)** Figure 3i probed for pMST1/2, MST1, and GAPDH (left to right).

**Figure S6. Uncropped co-immunoprecipitation assay and western blots from Figures 4, 6, and S3.**

Uncropped representative blots from **a)** Figure 4 co-immunoprecipitation assay Htt IP/14-3-3 IB and Htt IP/YAP IB (left to right); **b)** Figure 6 co-immunoprecipitation assay YAP IP/TEAD IB; **c)** Figure S3 western blot probed for YAP, Histone H3, and GAPDH (left to right).

Supplementary Table 1. Hippo array gene list. \* denotes significant differences in gene expression between control and HD cortex. MAPK10 is the only gene that was upregulated in HD as compared to control, indicated in red. \* p<0.05, \*\*p<0.01, \*\*\*p<0.0001.

| <b>Gene Name</b> | <b>Significant Change</b> |
|------------------|---------------------------|
| ACTG1            |                           |
| AMOT             |                           |
| AMOTL1           |                           |
| AMOTL2           |                           |
| CASP3            |                           |
| CCNE1            |                           |
| CCNE2            |                           |
| CRB1             |                           |
| CRB2             |                           |
| CRB3             |                           |
| CSNK1D           |                           |
| CSNK1E           |                           |
| DCHS1            |                           |
| DCHS2            |                           |
| DIAPH2           |                           |
| DLG1             | ***                       |
| DVL2             |                           |
| FAT1             | *                         |
| FAT2             |                           |
| FAT3             |                           |
| FAT4             |                           |
| FGX1             |                           |
| GPC5             |                           |
| HIPK2            | *                         |
| HMCN1            |                           |
| AJUBA            |                           |
| LATS1            |                           |
| LATS2            | *                         |
| LIMD1            |                           |
| LIX1L            | **                        |
| LLGL1            |                           |

|         |     |
|---------|-----|
| LLGL2   |     |
| LPP     |     |
| MAPK10  | *** |
| MEIS1   | **  |
| MOB1B   | **  |
| MOB1A   |     |
| MPDZ    |     |
| MPP5    |     |
| MST1    | **  |
| MYC     |     |
| NF2     | *** |
| NPHP4   |     |
| PARD3   |     |
| PARD6G  |     |
| POTEF   |     |
| PPP2CB  | *** |
| PPP2R1A |     |
| PPP2R2D |     |
| PRKCL   | *   |
| PRKCZ   |     |
| PTPN14  |     |
| RASSF2  | *** |
| RASSF4  |     |
| RERE    | **  |
| SAV1    | **  |
| SCRIB   |     |
| SMAD1   | *   |
| STK3    |     |
| STK4    | *   |
| TAOK1   |     |
| TAOK2   |     |
| TAOK3   |     |
| TAZ     |     |
| TEAD1   |     |
| TEAD2   |     |
| TEAD3   |     |
| TEAD4   |     |
| TJP1    |     |
| TJP2    |     |

|                |   |
|----------------|---|
| <i>TP63</i>    |   |
| <i>TSHZ1</i>   | * |
| <i>TSHZ2</i>   |   |
| <i>TSHZ3</i>   |   |
| <i>WNT1</i>    |   |
| <i>WTIP</i>    |   |
| <i>WWC1</i>    |   |
| <i>WWTR1</i>   |   |
| <i>YAP1</i>    |   |
| <i>YWHAB</i>   |   |
| <i>YWHAE</i>   |   |
| <i>YWHAQ</i>   |   |
| <i>YWHAZ</i>   |   |
| <i>ZDHHC18</i> |   |
